# Supplementary material for: Identifying high-performance catalytic conditions for carbon dioxide reduction to dimethoxymethane by multivariate modelling
Source: Royal Society of Chemistry journal article supplement (doi:10.1039/c9sc04591k), 2019-01-01
Supplement: c9sc04591k4.pdf [file c9sc04591k4.pdf]

# A Theoretical Multivariate Algorithm to Optimize Catalytic Conditions

One-factor-at-a-time (OFAT) method used for screening each catalytic variable

**OFAT**

- Time consuming
- Laborious
- Low turnover number (TON)

Carbon Dioxide (CO<sub>2</sub>)  
↓  
Dimethoxymethane (C<sub>3</sub>H<sub>8</sub>O<sub>2</sub>)

**Catalytic variables**

Y, S, C, T, L, I, A

CO<sub>2</sub>

C<sub>3</sub>H<sub>8</sub>O<sub>2</sub>

A scientist in a white lab coat stands in a laboratory setting with various glassware and a microscope. A green fuel nozzle is also visible.

A theoretical multivariate approach is proposed for screening high efficiency catalysts

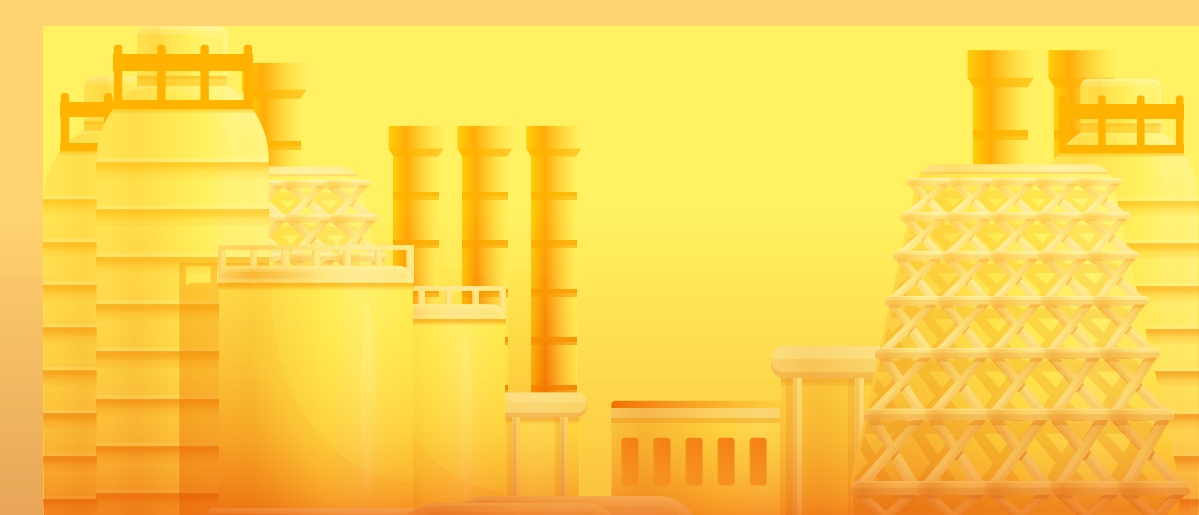

A multistep process combining elements from optimisation and machine learning

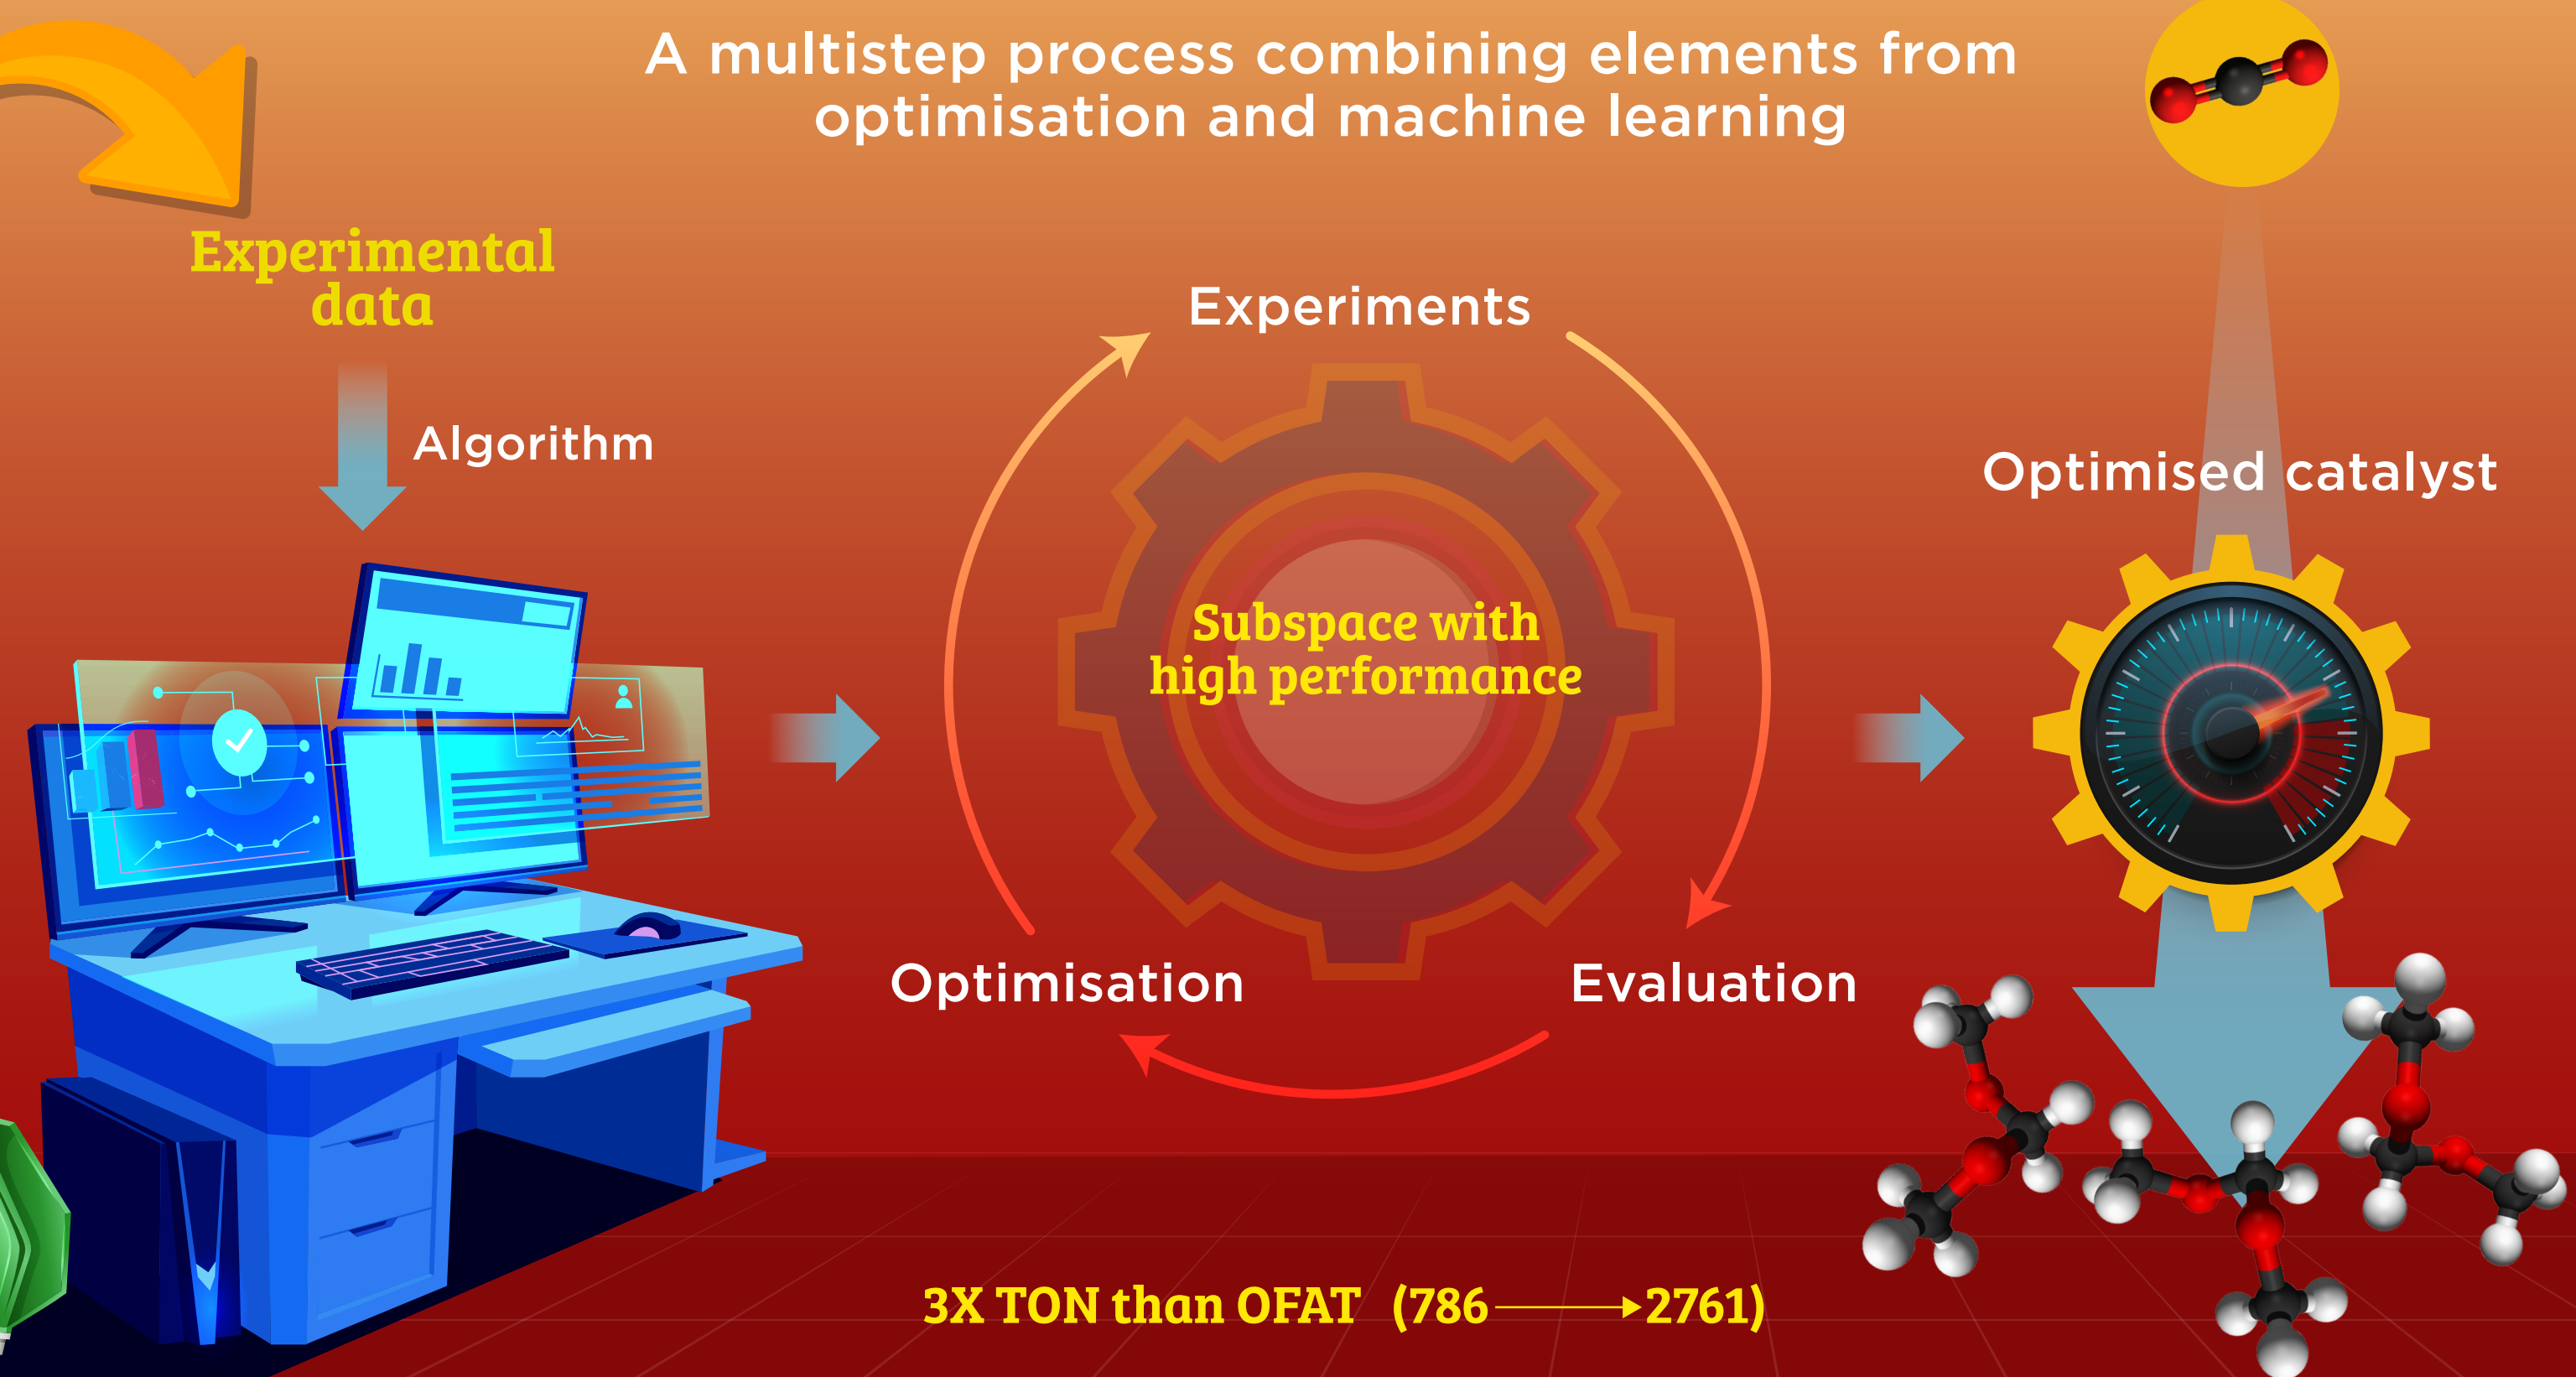

Using the optimised conditions obtained from the algorithm, the highest TON for the investigated catalysis can be obtained with minimum time, cost, and energy
