# Supplementary material for: Identifying high-performance catalytic conditions for carbon dioxide reduction to dimethoxymethane by multivariate modelling
Source: Chem Sci. 2019 Oct 24;10(45):10466–74. doi: 10.1039/c9sc04591k (PMC7012071; doi:10.1039/c9sc04591k)
Supplement: Supplementary file 1 [file SC-010-C9SC04591K-s001.xlsx]

## Sheet: historical.data
obsnr	m.kat	v.ml	m.add	T	p.h2	p.co2	t.h	ton.dmm	ton.mf
1	1.5	0.5	6.25	20	60	20	18	3.85633	48.7351
2	1.5	0.5	6.25	20	60	20	18	7.37733	45.773
3	1.5	0.5	6.25	20	60	20	18	12.8265	58.6833
4	1.5	0.5	6.25	70	60	20	18	154.421	164.816
5	1.5	0.5	6.25	70	60	20	18	155.679	162.916
6	1.5	0.5	6.25	70	60	20	18	181.08	155.651
7	1.5	0.5	6.25	80	60	20	18	268.602	108.201
8	1.5	0.5	6.25	80	60	20	18	289.141	114.908
9	1.5	0.5	6.25	80	60	20	18	318.818	113.902
10	1.5	0.5	6.25	85	60	20	18	314.123	96.2966
11	1.5	0.5	6.25	85	60	20	18	329.214	91.2666
12	1.5	0.5	6.25	85	60	20	18	329.465	92.3284
13	1.5	0.5	6.25	90	60	20	18	295.848	79.8093
14	1.5	0.5	6.25	90	60	20	18	313.369	88.1368
15	1.5	0.5	6.25	90	60	20	18	319.656	87.5779
16	1.5	0.5	6.25	95	60	20	18	263.488	69.414
17	1.5	0.5	6.25	95	60	20	18	271.117	76.456
18	1.5	0.5	6.25	95	60	20	18	279.668	74.444
19	1.5	0.5	6.25	100	60	20	18	200.697	69.9729
20	1.5	0.5	6.25	100	60	20	18	205.056	58.9069
21	1.5	0.5	6.25	100	60	20	18	218.889	69.2463
22	1.5	0.5	6.25	110	60	20	18	111.331	47.7291
23	1.5	0.5	6.25	110	60	20	18	118.373	50.5236
24	1.5	0.5	6.25	110	60	20	18	128.768	58.0127
25	1.5	0.5	6.25	120	60	20	18	47.4497	40.9107
26	1.5	0.5	6.25	120	60	20	18	60.36	42.8109
27	1.5	0.5	6.25	120	60	20	18	60.5277	41.9167
28	1.5	0.5	6.25	90	40	20	18	241.189	66.7872
29	1.5	0.5	6.25	90	40	20	18	243.033	70.0847
30	1.5	0.5	6.25	90	40	20	18	266.087	70.0288
31	1.5	0.5	6.25	90	50	20	18	254.183	75.7853
32	1.5	0.5	6.25	90	50	20	18	289.225	79.8093
33	1.5	0.5	6.25	90	50	20	18	292.998	71.7054
34	1.5	0.5	6.25	90	70	20	18	291.488	86.6278
35	1.5	0.5	6.25	90	70	20	18	332.483	80.2006
36	1.5	0.5	6.25	90	70	20	18	334.411	80.6477
37	1.5	0.5	6.25	90	80	20	18	291.908	77.0708
38	1.5	0.5	6.25	90	80	20	18	333.238	86.4042
39	1.5	0.5	6.25	90	80	20	18	352.351	84.8393
40	1.5	0.5	6.25	90	90	20	18	347.992	90.7077
41	1.5	0.5	6.25	90	90	20	18	358.136	84.5599
42	1.5	0.5	6.25	90	90	20	18	383.37	101.774
43	1.5	0.5	6.25	90	100	20	18	303.393	82.1008
44	1.5	0.5	6.25	90	100	20	18	335.501	92.7197
45	1.5	0.5	6.25	90	100	20	18	356.711	84.0569
46	1.5	0.5	6.25	90	90	5	18	86.013	7.71267
47	1.5	0.5	6.25	90	90	5	18	86.6837	7.76856
48	1.5	0.5	6.25	90	90	5	18	117.87	8.71867
49	1.5	0.5	6.25	90	90	10	18	202.122	33.9246
50	1.5	0.5	6.25	90	90	10	18	213.775	37.725
51	1.5	0.5	6.25	90	90	10	18	221.907	33.9804
52	1.5	0.5	6.25	90	90	15	18	271.536	64.7193
53	1.5	0.5	6.25	90	90	15	18	322.255	70.9789
54	1.5	0.5	6.25	90	90	15	18	346.651	69.3022
55	1.5	0.5	6.25	90	90	25	18	341.286	108.648
56	1.5	0.5	6.25	90	90	25	18	357.633	93.9492
57	1.5	0.5	6.25	90	90	25	18	383.202	100.265
58	1.5	0.5	6.25	90	90	30	18	317.058	100.544
59	1.5	0.5	6.25	90	90	30	18	319.656	112.728
60	1.5	0.5	6.25	90	90	30	18	348.914	110.884
61	1.5	0.5	6.25	90	90	40	18	259.464	120.161
62	1.5	0.5	6.25	90	90	40	18	277.824	116.472
63	1.5	0.5	6.25	90	90	40	18	287.297	116.137
64	1.5	0.5	6.25	90	90	5	1	20.0362	36.0483
65	1.5	0.5	6.25	90	90	5	1	20.7907	36.3837
66	1.5	0.5	6.25	90	90	5	1	20.8745	31.5772
67	1.5	0.5	6.25	90	90	5	6	94.6478	12.9103
68	1.5	0.5	6.25	90	90	5	6	95.3185	14.1399
69	1.5	0.5	6.25	90	90	5	6	102.193	20.12
70	1.5	0.5	6.25	90	90	5	12	91.1268	10.6748
71	1.5	0.5	6.25	90	90	5	12	96.8275	11.1778
72	1.5	0.5	6.25	90	90	5	12	129.523	18.0521
73	1.5	0.5	6.25	90	90	5	24	69.4978	6.539
74	1.5	0.5	6.25	90	90	5	24	92.8873	8.27156
75	1.5	0.5	6.25	90	90	5	24	93.558	5.36533
76	1.5	0.5	6.25	90	90	5	48	29.677	2.90622
77	1.5	0.5	6.25	90	90	5	48	38.1442	4.30344
78	1.5	0.5	6.25	90	90	5	48	57.4258	5.47711
79	1.5	0.5	6.25	90	90	5	72	12.2397	1.06189
80	1.5	0.5	6.25	90	90	5	72	15.09	1.95611
81	1.5	0.5	6.25	90	90	5	72	33.0303	4.97411
82	1.5	0.5	6.25	90	90	5	168	3.18567	0
83	1.5	0.5	6.25	90	90	5	168	3.43717	0
84	1.5	0.5	6.25	90	90	5	168	4.94617	0
85	1.5	0.5	6.25	90	90	20	1	14.7547	71.0348
86	1.5	0.5	6.25	90	90	20	1	17.3535	56.2801
87	1.5	0.5	6.25	90	90	20	1	17.4373	60.2482
88	1.5	0.5	6.25	90	90	20	6	156.685	61.2542
89	1.5	0.5	6.25	90	90	20	6	157.523	61.3101
90	1.5	0.5	6.25	90	90	20	6	163.307	65.8371
91	1.5	0.5	6.25	90	90	20	12	216.877	74.1087
92	1.5	0.5	6.25	90	90	20	12	222.745	74.6117
93	1.5	0.5	6.25	90	90	20	12	305.321	100.544
94	1.5	0.5	6.25	90	90	20	24	294.674	74.8911
95	1.5	0.5	6.25	90	90	20	24	325.86	78.3562
96	1.5	0.5	6.25	90	90	20	24	330.136	78.6916
97	1.5	0.5	6.25	90	90	20	48	271.452	55.8889
98	1.5	0.5	6.25	90	90	20	48	302.638	64.5517
99	1.5	0.5	6.25	90	90	20	48	306.159	61.3101
100	1.5	0.5	6.25	90	90	20	72	229.117	55.6094
101	1.5	0.5	6.25	90	90	20	72	238.087	53.5416
102	1.5	0.5	6.25	90	90	20	72	262.063	55.4418
103	1.5	0.5	6.25	90	90	20	168	167.667	43.9846
104	1.5	0.5	6.25	90	90	20	168	171.523	47.8409
105	1.5	0.5	6.25	90	90	20	168	191.475	47.8409
106	0.1875	0.5	0.78125	90	90	20	18	668.655	1374.87
107	0.1875	0.5	0.78125	90	90	20	18	669.996	1114.65
108	0.1875	0.5	0.78125	90	90	20	18	846.381	1376.66
109	0.375	0.5	1.5625	90	90	20	18	725.326	520.661
110	0.375	0.5	1.5625	90	90	20	18	784.68	526.697
111	0.375	0.5	1.5625	90	90	20	18	849.399	552.406
112	0.75	0.5	3.125	90	90	20	18	443.478	159.395
113	0.75	0.5	3.125	90	90	20	18	509.707	240.434
114	0.75	0.5	3.125	90	90	20	18	629.588	219.196
115	2.25	0.5	9.375	90	90	20	18	180.13	44.264
116	2.25	0.5	9.375	90	90	20	18	202.877	50.3745
117	2.25	0.5	9.375	90	90	20	18	219.308	45.6799
118	3	0.5	12.5	90	90	20	18	117.325	35.21
119	3	0.5	12.5	90	90	20	18	119.379	31.4375
120	3	0.5	12.5	90	90	20	18	130.738	32.3597
121	0.375	0.5	0.9375	90	90	20	18	345.393	633.109
122	0.375	0.5	0.9375	90	90	20	18	467.119	641.828
123	0.375	0.5	0.9375	90	90	20	18	527.144	675.585
124	0.375	0.5	1.25	90	90	20	18	455.383	476.397
125	0.375	0.5	1.25	90	90	20	18	456.053	468.125
126	0.375	0.5	1.25	90	90	20	18	683.074	587.951
127	0.375	0.5	1.875	90	90	20	18	643.505	371.102
128	0.375	0.5	1.875	90	90	20	18	705.206	366.408
129	0.375	0.5	1.875	90	90	20	18	744.775	506.8
130	0.375	0.5	2.1875	90	90	20	18	648.199	386.975
131	0.375	0.5	2.1875	90	90	20	18	712.248	392.116
132	0.375	0.5	2.1875	90	90	20	18	906.406	558.889
133	0.375	0.5	2.5	90	90	20	18	699.17	326.615
134	0.375	0.5	2.5	90	90	20	18	754.835	470.137
135	0.375	0.5	2.5	90	90	20	18	789.039	535.192
136	0	0.5	0	90	90	20	18	0.167667	5.70067
137	0	0.5	0	90	90	20	18	0.503	2.45911
138	1.5	0.5	0	90	90	20	18	0	7.71267
139	1.5	0.5	0	90	90	20	18	0.670667	11.1778
140	0	0.5	6.25	90	90	20	18	0	4.58289
141	0	0.5	6.25	90	90	20	18	0.503	5.47711
142	0.375	0.25	1.5625	90	90	20	18	604.103	204.106
143	0.375	0.25	1.5625	90	90	20	18	616.343	188.457
144	0.375	0.25	1.5625	90	90	20	18	631.097	195.499

## Sheet: DoE1
obsnr	m.kat	v.ml	m.add	T	p.h2	p.co2	t.h	ton.dmm	ton.mf
1	0.75	0.5	3.125	90	90	20	18	629.588	219.196
2	0.75	0.5	3.125	90	90	20	18	443.478	159.395
3	0.75	0.5	3.125	90	90	20	18	509.707	240.434
4	0.375	0.5	1.5625	90	90	20	18	784.68	526.697
5	0.375	0.5	1.5625	90	90	20	18	725.326	520.661
6	0.375	0.5	1.5625	90	90	20	18	849.399	552.406
7	0.1875	0.5	0.78125	90	90	20	18	846.381	1376.66
8	0.1875	0.5	0.78125	90	90	20	18	669.996	1114.65
9	0.1875	0.5	0.78125	90	90	20	18	668.655	1374.87
10	0.375	0.5	1.875	90	90	20	18	643.505	371.102
11	0.375	0.5	1.875	90	90	20	18	705.206	366.408
12	0.375	0.5	1.875	90	90	20	18	744.775	506.8
13	0.375	0.5	1.25	90	90	20	18	455.383	476.397
14	0.375	0.5	1.25	90	90	20	18	456.053	468.125
15	0.375	0.5	1.25	90	90	20	18	683.074	587.951
16	0.375	0.5	2.1875	90	90	20	18	906.406	558.889
17	0.375	0.5	2.1875	90	90	20	18	712.248	392.116
18	0.375	0.5	2.1875	90	90	20	18	648.199	386.975
19	0.375	0.5	0.9375	90	90	20	18	527.144	675.585
20	0.375	0.5	0.9375	90	90	20	18	467.119	641.828
21	0.375	0.5	2.5	90	90	20	18	789.039	535.192
22	0.375	0.5	2.5	90	90	20	18	754.835	470.137
23	0.375	0.5	2.5	90	90	20	18	699.17	326.615
24	0.375	0.25	1.5625	90	90	20	18	604.103	204.106
25	0.375	0.25	1.5625	90	90	20	18	616.343	188.457
26	0.375	0.25	1.5625	90	90	20	18	631.097	195.499
27	0.75	0.25	0.78125	90	90	20	18	194.745	89.0869
28	0.75	0.25	0.78125	90	90	20	18	195.918	85.1188
29	0.75	0.25	0.78125	90	90	20	18	220.398	94.5081
30	0.75	0.5	0.78125	90	90	20	18	123.738	210.366
31	0.75	0.5	0.78125	90	90	20	18	113.678	191.14
32	0.75	0.5	0.78125	90	90	20	18	120.72	212.154
33	0.75	0.375	1.95312	90	90	20	18	336.759	122.229
34	0.75	0.375	1.95312	90	90	20	18	335.124	109.738
35	0.75	0.375	1.95312	90	90	20	18	354.615	115.606
36	0.1875	0.25	3.125	90	90	20	18	1161.59	437.051
37	0.1875	0.25	3.125	90	90	20	18	1146.5	415.143
38	0.1875	0.25	3.125	90	90	20	18	1039.87	457.618
39	0.75	0.25	3.125	90	90	20	18	310.267	77.7414
40	0.75	0.25	3.125	90	90	20	18	307.668	80.2564
41	0.75	0.25	3.125	90	90	20	18	323.178	80.1447
42	0.46875	0.375	3.125	90	90	20	18	627.543	194.225
43	0.46875	0.375	3.125	90	90	20	18	672.612	213.004
44	0.46875	0.375	3.125	90	90	20	18	549.88	195.432

## Sheet: Relaxation1
obsnr	Relaxation%	m.kat	v.ml	m.add	T	p.h2	p.co2	t.h	ton.dmm	ton.mf
1	10	0.1313	0.525	3.3594	90	90	20	18	1474.83	1705.54
2	10	0.1313	0.525	3.3594	90	90	20	18	1071.42	1430.56
3	10	0.1313	0.525	3.3594	90	90	20	18	1574.43	1542.57
4	20	0.075	0.55	3.576	90	90	20	18	1546.18	2795.9
5	20	0.075	0.55	3.576	90	90	20	18	1516.66	2868.48
6	20	0.075	0.55	3.576	90	90	20	18	1060.92	2621.24
7	30	0.0188	0.575	3.6594	90	90	20	18	38.4764	1026.03
8	30	0.0188	0.575	3.6594	90	90	20	18	7.69527	995.251
9	30	0.0188	0.575	3.6594	90	90	20	18	492.498	1097.85

## Sheet: DoE2
obsnr	m.kat	v.ml	m.add	T	p.h2	p.co2	t.h	ton.dmm	ton.mf
1	0.075	0.55	3.576	90	90	20	18	1415.18	2714.72
2	0.075	0.55	3.576	90	90	20	18	1367.21	2740.55
3	0.075	0.55	3.576	90	90	20	18	1199.3	2961.96
4	0.075	0.55	3.576	80	100	25	20	837.667	3189.52
5	0.075	0.55	3.576	80	100	25	20	924.386	3226.42
6	0.075	0.55	3.576	80	100	25	20	905.935	3425.69
7	0.075	0.55	3.576	100	80	25	20	1077.53	2934.9
8	0.075	0.55	3.576	100	80	25	20	1046.16	2880.78
9	0.075	0.55	3.576	100	80	25	20	1420.71	2991.48
10	0.075	0.55	3.576	80	80	15	16	426.214	1943.48
11	0.075	0.55	3.576	80	80	15	16	319.199	1725.76
12	0.075	0.55	3.576	80	80	15	16	651.314	2318.64
13	0.075	0.55	3.576	100	100	15	20	2450.27	2450.26
14	0.075	0.55	3.576	100	100	15	20	2300.82	2355.54
15	0.075	0.55	3.576	100	100	15	20	3079.44	2263.29
16	0.075	0.55	3.576	100	100	25	16	1522.19	2947.2
17	0.075	0.55	3.576	100	100	25	16	2048.04	3305.14
18	0.075	0.55	3.576	100	100	25	16	1795.26	3313.75
19	0.075	0.55	3.576	90	90	20	18	1167.94	2403.52
20	0.075	0.55	3.576	90	90	20	18	1345.06	3167.38
21	0.075	0.55	3.576	90	90	20	18	1365.36	3160

## Sheet: Relaxation2
obsnr	Relaxation	m.kat	v.ml	m.add	T	p.h2	p.co2	t.h	ton.dmm	ton.mf
1	0	0.075	0.55	3.576	100	100	15	20	2802.68	2230.08
2	0	0.075	0.55	3.576	100	100	15	20	2409.68	2426.89
3	0	0.075	0.55	3.576	100	100	15	20	2477.94	2547.43
4	25	0.075	0.55	3.576	105	105	12.5	21	2594.18	1831.54
5	25	0.075	0.55	3.576	105	105	12.5	21	2712.27	1709.77
6	25	0.075	0.55	3.576	105	105	12.5	21	2976.12	1765.12
7	50	0.075	0.55	3.576	110	110	10	22	2149.52	1314.92
8	50	0.075	0.55	3.576	110	110	10	22	2297.13	1328.45
9	50	0.075	0.55	3.576	110	110	10	22	2179.04	1183.31
